# Supplementary material for: Transcriptome-wide analysis of glioma stem cell specific m6A modifications in long-non-coding RNAs
Source: PubMed Central journal article supplement (PMC8971438; doi:10.1038/s41598-022-08616-z), 2022-03-31
Supplement: 41598_2022_8616_MOESM1_ESM.pdf [file 41598_2022_8616_MOESM1_ESM.pdf]

## STUDY FLOW CHART

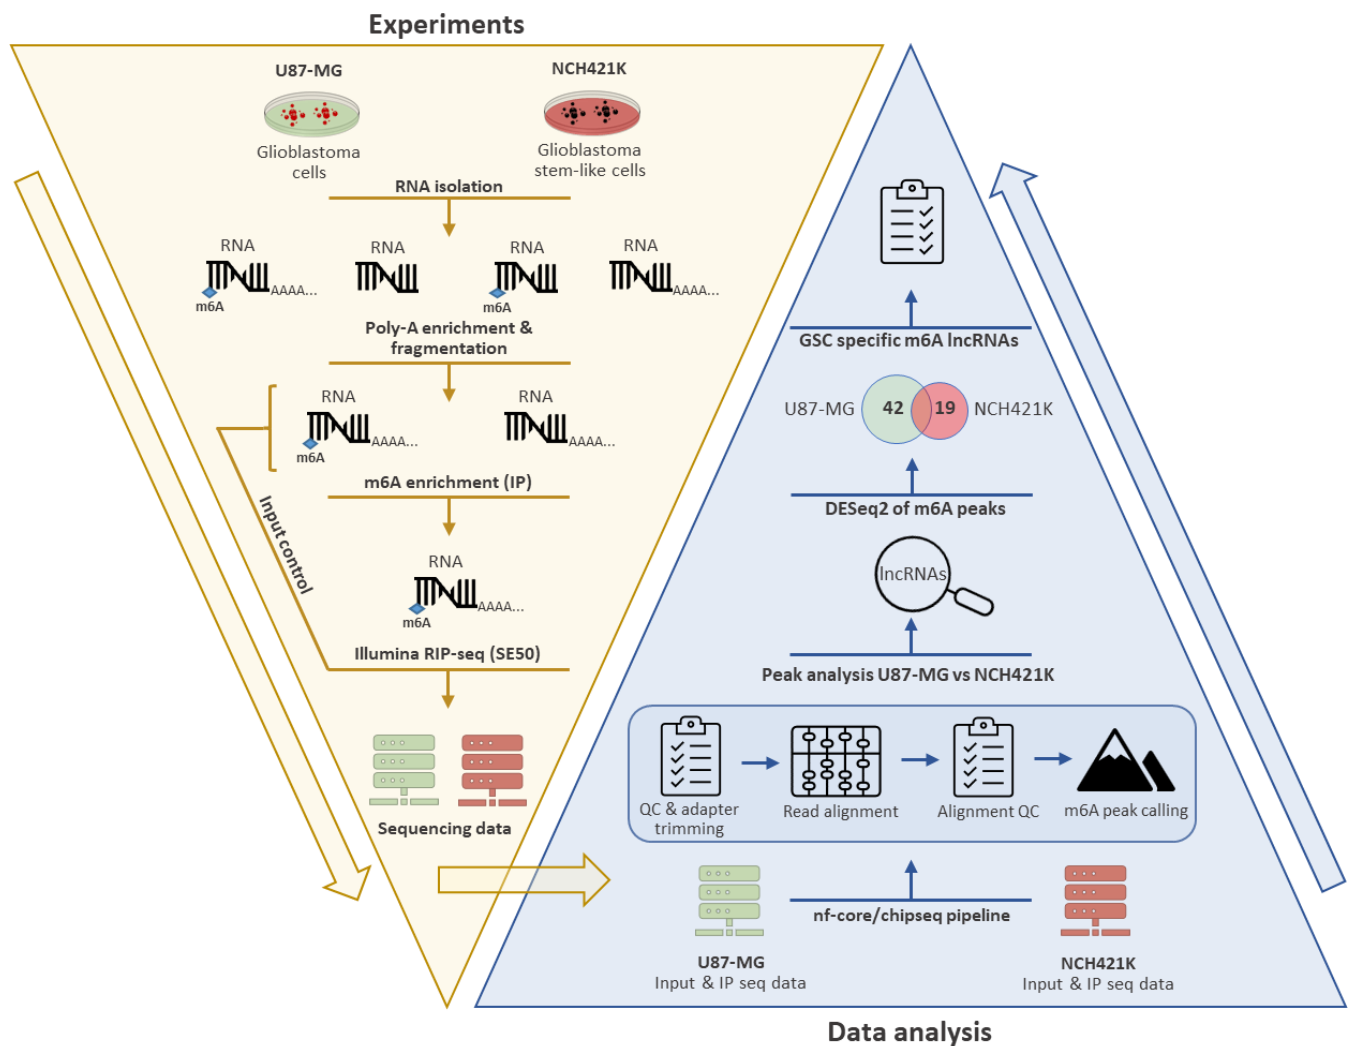

**Supplementary figure S1.** Study flow chart of experimental design and data analysis. U87-MG and NCH421K cell lines were used to establish GSC specific m6A modifications of lncRNAs. m6A MeRIP assay was applied to fish-out RNAs having methylated adenines (m6A mark) in both cell lines (in triplicate). Next RNA sequencing (applying Illumina RIP-seq; depth 50mb) was used for m6A RNAs identification. Data analysis pipeline part consisted of following steps: quality control; adapter trimming; read alignment; m6A peaks calling. Next, glioma stem cells specifically m6A modified lncRNAs were identified applying DESeq2 analysis.

**Table S1.** The detailed information of U87-MG cells specific m6A peaks

| Ensembl gene id | Ensembl transcript id | Peak length | log2 FC# | q-value* | Gene name          | Peak location             |
|-----------------|-----------------------|-------------|----------|----------|--------------------|---------------------------|
| ENSG00000259583 | ENST00000560351       | 441         | -9.36603 | 2.09E-38 |                    | chr15:101454896-101455335 |
| ENSG00000260944 | ENST00000563280       | 1634        | -7.23666 | 1.06E-93 | <i>FOXC2-AS1</i>   | chr16:86601118-86602750   |
| ENSG00000261253 | ENST00000562995       | 1465        | -5.99557 | 1.77E-18 |                    | chr16:89386638-89388101   |
| ENSG00000265799 | ENST00000583462       | 359         | -10.5414 | 2.63E-14 |                    | chr17:38171710-38172067   |
| ENSG00000265091 | ENST00000581170       | 1008        | -10.4158 | 1.09E-30 | <i>LINC00667</i>   | chr18:5238038-5239044     |
| ENSG00000266554 | ENST00000584531       | 465         | -10.6007 | 1.18E-15 | <i>LINC01443</i>   | chr18:14962489-14962952   |
| ENSG00000266554 | ENST00000584531       | 353         | -9.98637 | 2.96E-13 | <i>LINC01443</i>   | chr18:14965663-14966014   |
| ENSG00000266010 | ENST00000649008       | 475         | -9.01552 | 1.46E-09 | <i>GATA6-AS1</i>   | chr18:19749393-19749866   |
| ENSG00000265717 | ENST00000579714       | 845         | -9.81463 | 1.35E-12 |                    | chr18:73966207-73967050   |
| ENSG00000269386 | ENST00000597785       | 452         | -6.66958 | 2.18E-30 | <i>RAB11B-AS1</i>  | chr19:8438744-8439194     |
| ENSG00000232973 | ENST00000628232       | 271         | -5.37517 | 1.12E-17 | <i>CYP11B1-AS1</i> | chr2:38302893-38303162    |
| ENSG00000238279 | ENST00000420695       | 860         | -9.19351 | 5.01E-57 |                    | chr1:153507076-153507934  |
| ENSG00000231290 | ENST00000427140       | 494         | -7.26108 | 1.1E-11  | <i>APCDD1L-DT</i>  | chr20:57100360-57100852   |
| ENSG00000272668 | ENST00000608430       | 331         | -9.32586 | 9.87E-11 |                    | chr1:159837039-159837368  |
| ENSG00000215196 | ENST00000399760       | 321         | -6.02075 | 4.04E-42 | <i>BASP1-AS1</i>   | chr5:17217696-17218015    |
| ENSG00000234695 | ENST00000435257       | 692         | -8.89201 | 1.82E-52 | <i>TFPI2-DT</i>    | chr7:93519449-93520139    |
| ENSG00000204876 | ENST00000684576       | 720         | -9.63824 | 7.33E-12 |                    | chr7:155757158-155757876  |
| ENSG00000253746 | ENST00000520431       | 289         | -8.59909 | 1.24E-09 |                    | chr8:37264290-37264577    |
| ENSG00000237807 | ENST00000426023       | 569         | -9.95657 | 3.97E-13 |                    | chr8:54435866-54436433    |
| ENSG00000235531 | ENST00000521467       | 585         | -5.21706 | 2.66E-28 | <i>MSC-AS1</i>     | chr8:72754430-72755013    |
| ENSG00000226576 | ENST00000422966       | 640         | -9.53822 | 3.32E-11 |                    | chr10:50226539-50227177   |
| ENSG00000222047 | ENST00000409178       | 567         | -5.61122 | 9.48E-32 | <i>C10orf55</i>    | chr10:75670903-75671468   |
| ENSG00000222047 | ENST00000409178       | 666         | -5.96898 | 1.7E-129 | <i>C10orf55</i>    | chr10:75676108-75676772   |
| ENSG00000272734 | ENST00000609170       | 864         | -10.7752 | 3.97E-17 | <i>ADIRF-AS1</i>   | chr10:88728857-88729719   |
| ENSG00000273413 | ENST00000609363       | 612         | -9.83901 | 1.77E-18 |                    | chr10:88730349-88730959   |
| ENSG00000270075 | ENST00000472915       | 996         | -4.79891 | 9.75E-88 |                    | chr10:106073059-106074053 |
| ENSG00000255031 | ENST00000529934       | 648         | -7.83074 | 7.84E-28 |                    | chr11:67819301-67819947   |
| ENSG00000261276 | ENST00000562506       | 559         | -7.47418 | 3.12E-30 |                    | chr11:68772378-68772935   |
| ENSG00000246627 | ENST00000501371       | 299         | -9.00189 | 4.37E-15 | <i>CACNA1C-AS1</i> | chr12:2800140-2800437     |
| ENSG00000246627 | ENST00000501371       | 294         | -10.179  | 5.24E-14 | <i>CACNA1C-AS1</i> | chr12:2800702-2800994     |
| ENSG00000215039 | ENST00000535639       | 241         | -4.93746 | 2.18E-11 | <i>CD27-AS1</i>    | chr12:6561255-6561494     |
| ENSG00000256001 | ENST00000541419       | 1194        | -12.1179 | 1.11E-21 |                    | chr12:127630330-127631522 |
| ENSG00000256542 | ENST00000537762       | 351         | -7.96112 | 5.01E-20 |                    | chr12:132853787-132854136 |
| ENSG00000256542 | ENST00000537762       | 871         | -9.97918 | 2.62E-37 |                    | chr12:132855906-132856775 |
| ENSG00000255874 | ENST00000538077       | 930         | -5.1073  | 1.49E-31 | <i>PRECSIT</i>     | chr13:111521079-111522007 |
| ENSG00000260910 | ENST00000562710       | 750         | -7.29478 | 1.13E-14 | <i>LINC00565</i>   | chr13:114629834-114630582 |
| ENSG00000225313 | ENST00000627421       | 707         | -5.50268 | 1.3E-13  |                    | chr1:33772196-33772901    |
| ENSG00000259721 | ENST00000558441       | 220         | -10.1266 | 8.39E-14 |                    | chr15:33010267-33010485   |
| ENSG00000259705 | ENST00000558061       | 305         | -5.13067 | 1.1E-21  |                    | chr15:48937648-48937951   |
| ENSG00000259426 | ENST00000558617       | 227         | -6.33735 | 2.45E-10 |                    | chr15:69695980-69696205   |
| ENSG00000261801 | ENST00000565689       | 276         | -9.04241 | 1.79E-09 | <i>LOXL1-AS1</i>   | chr15:74211252-74211526   |
| ENSG00000259546 | ENST00000560873       | 318         | -5.58148 | 4.78E-26 |                    | chr15:81241136-81241452   |

# FC – fold change of m6A peak signal

\* - FDR adjusted p-value

AGAP2-AS1

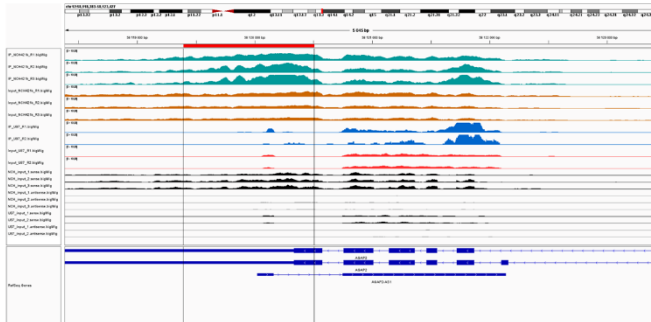

CEROX1

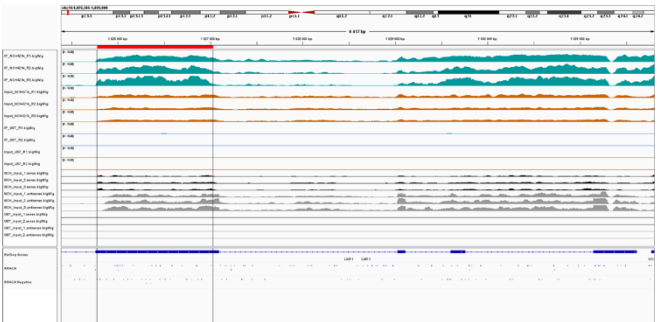

ENSG00000262223

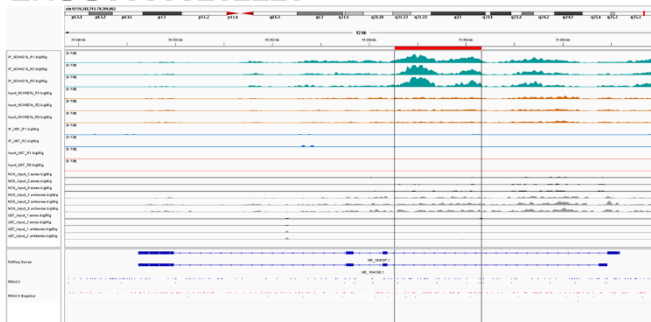

HRAT92

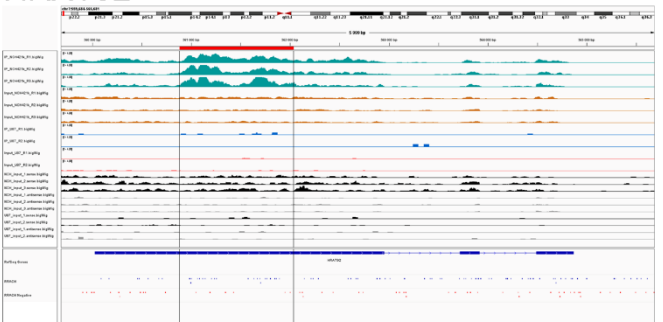

MIAT

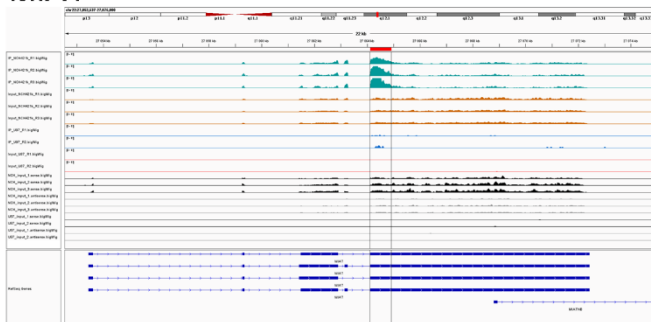

PVT1

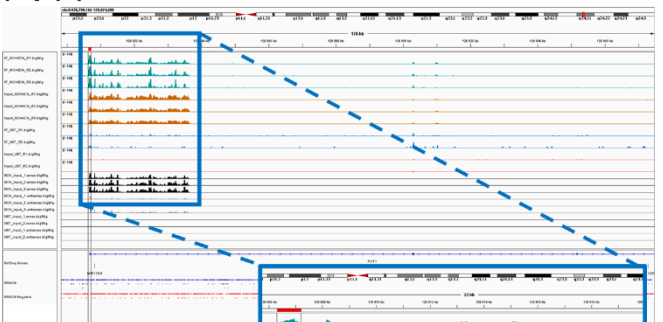

SLO4A1-AS1

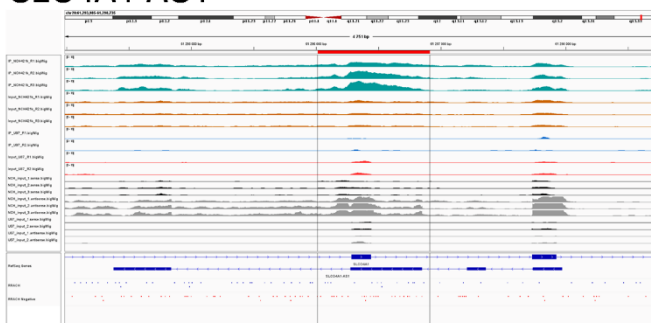

| lncRNA          | scale |
|-----------------|-------|
| AGAP2-AS1       | 10    |
| CEROX1          | 10    |
| ENSG00000262223 | 8     |
| HRAT92          | 4     |
| MIAT            | 11    |
| PVT1            | 8     |
| SLO4A1-AS1      | 15    |

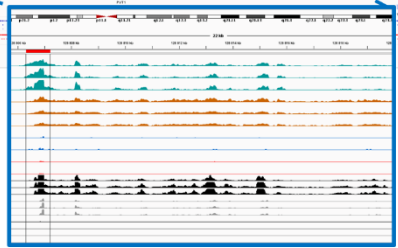

**Supplementary figure S2.** RNA m6A modification peaks of screened lncRNAs visualized applying Integrative Genomics Viewer (IGV). Emerald and blue colored lines indicate m6A IP peaks of NCH421K and U87-MG cells, respectively. Orange and pink colored lines indicate input samples peaks of NCH421K and U87-MG cells, respectively. Black and grey peaks indicate mRNA expression peaks according to sense and antisense strands. Different scales were applied for detected peaks visualization using IGV. The higher scale count means the higher peak IP enrichment score (strong signal).

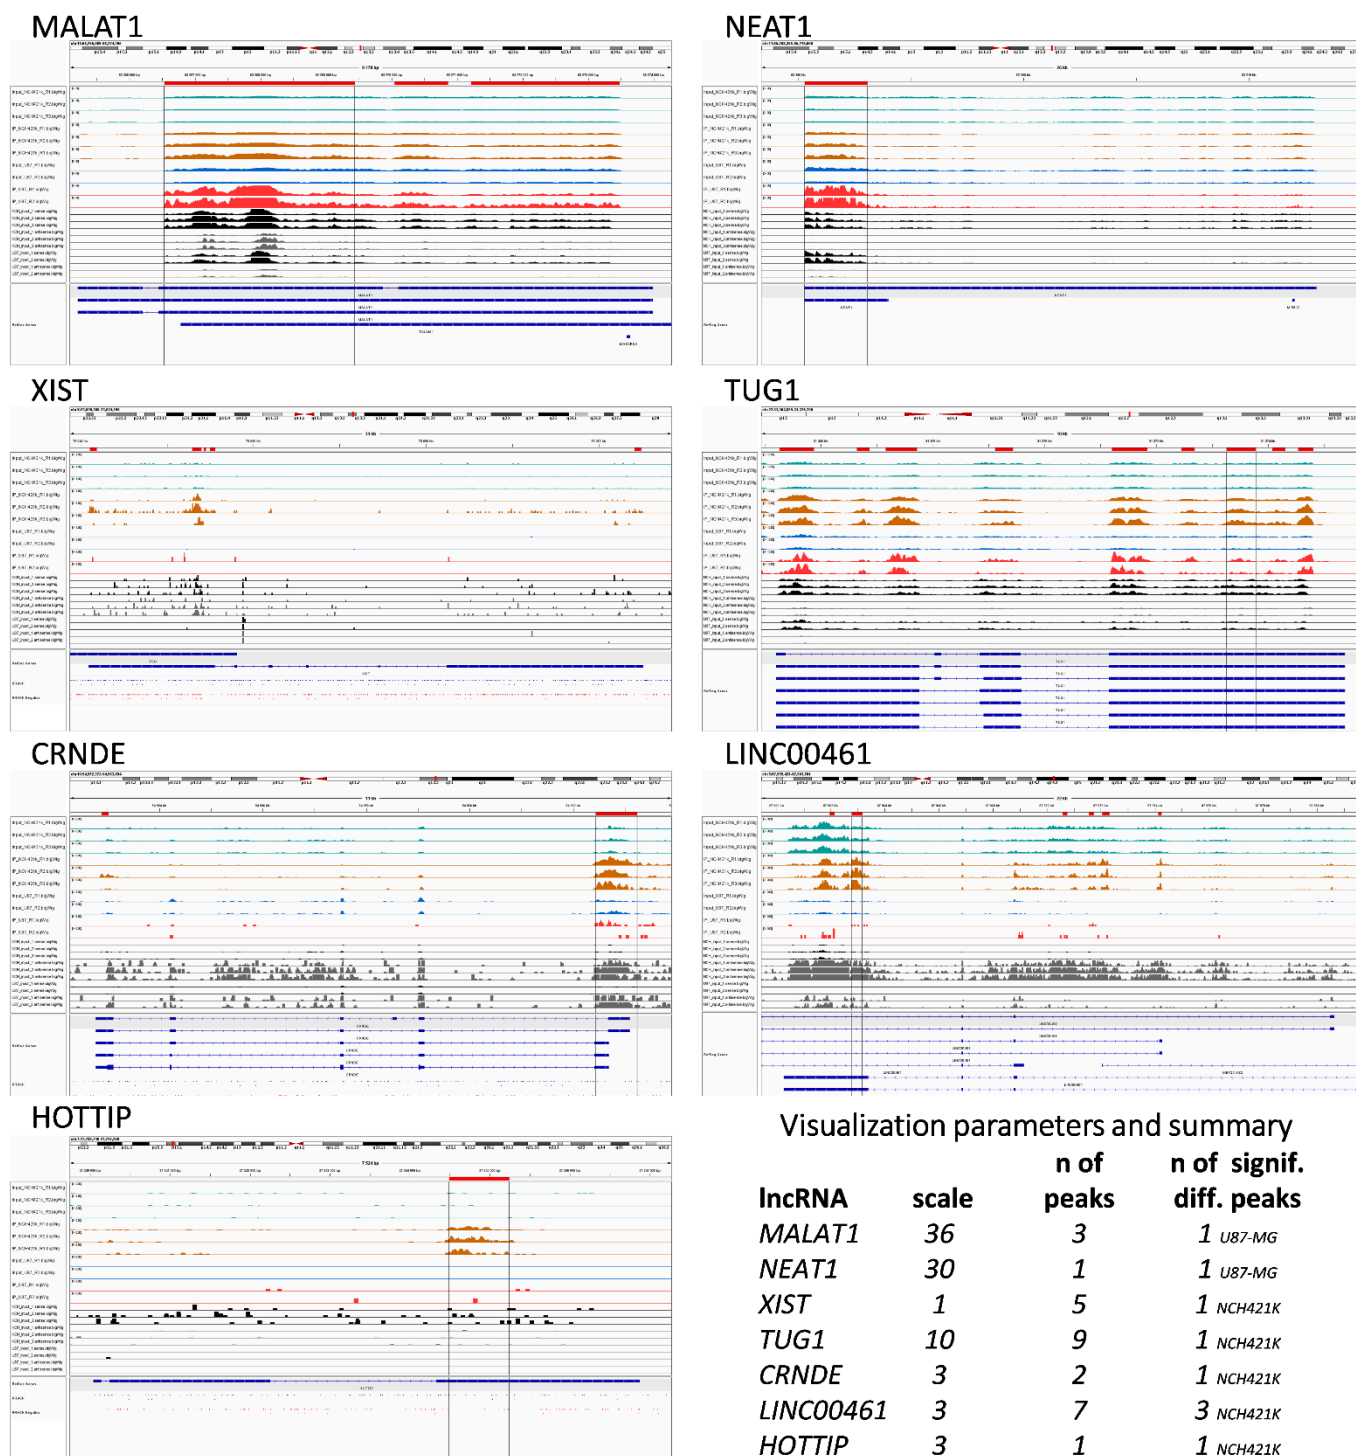

**Supplementary figure S3.** RNA m6A modification peaks of glioma associated lncRNAs visualized applying Integrative Genomics Viewer (IGV). The first three emerald and orange tracks represent NCH421K cells, while two blue and pink tracks represent U87-MG cells peaks. Black and grey peaks indicate mRNA expression peaks according to sense and antisense strands of NCH421K cells. Thick red lines/rectangles at the top represent detected m6A peaks, the horizontal black lines delineating red rectangles indicates differentially between cell lines enriched one m6A peak with the highest significance. Different scales were applied for peaks visualization using IGV (specified in “visualization parameters and summary” part). The higher scale count means the higher peak IP enrichment score (strong signal).

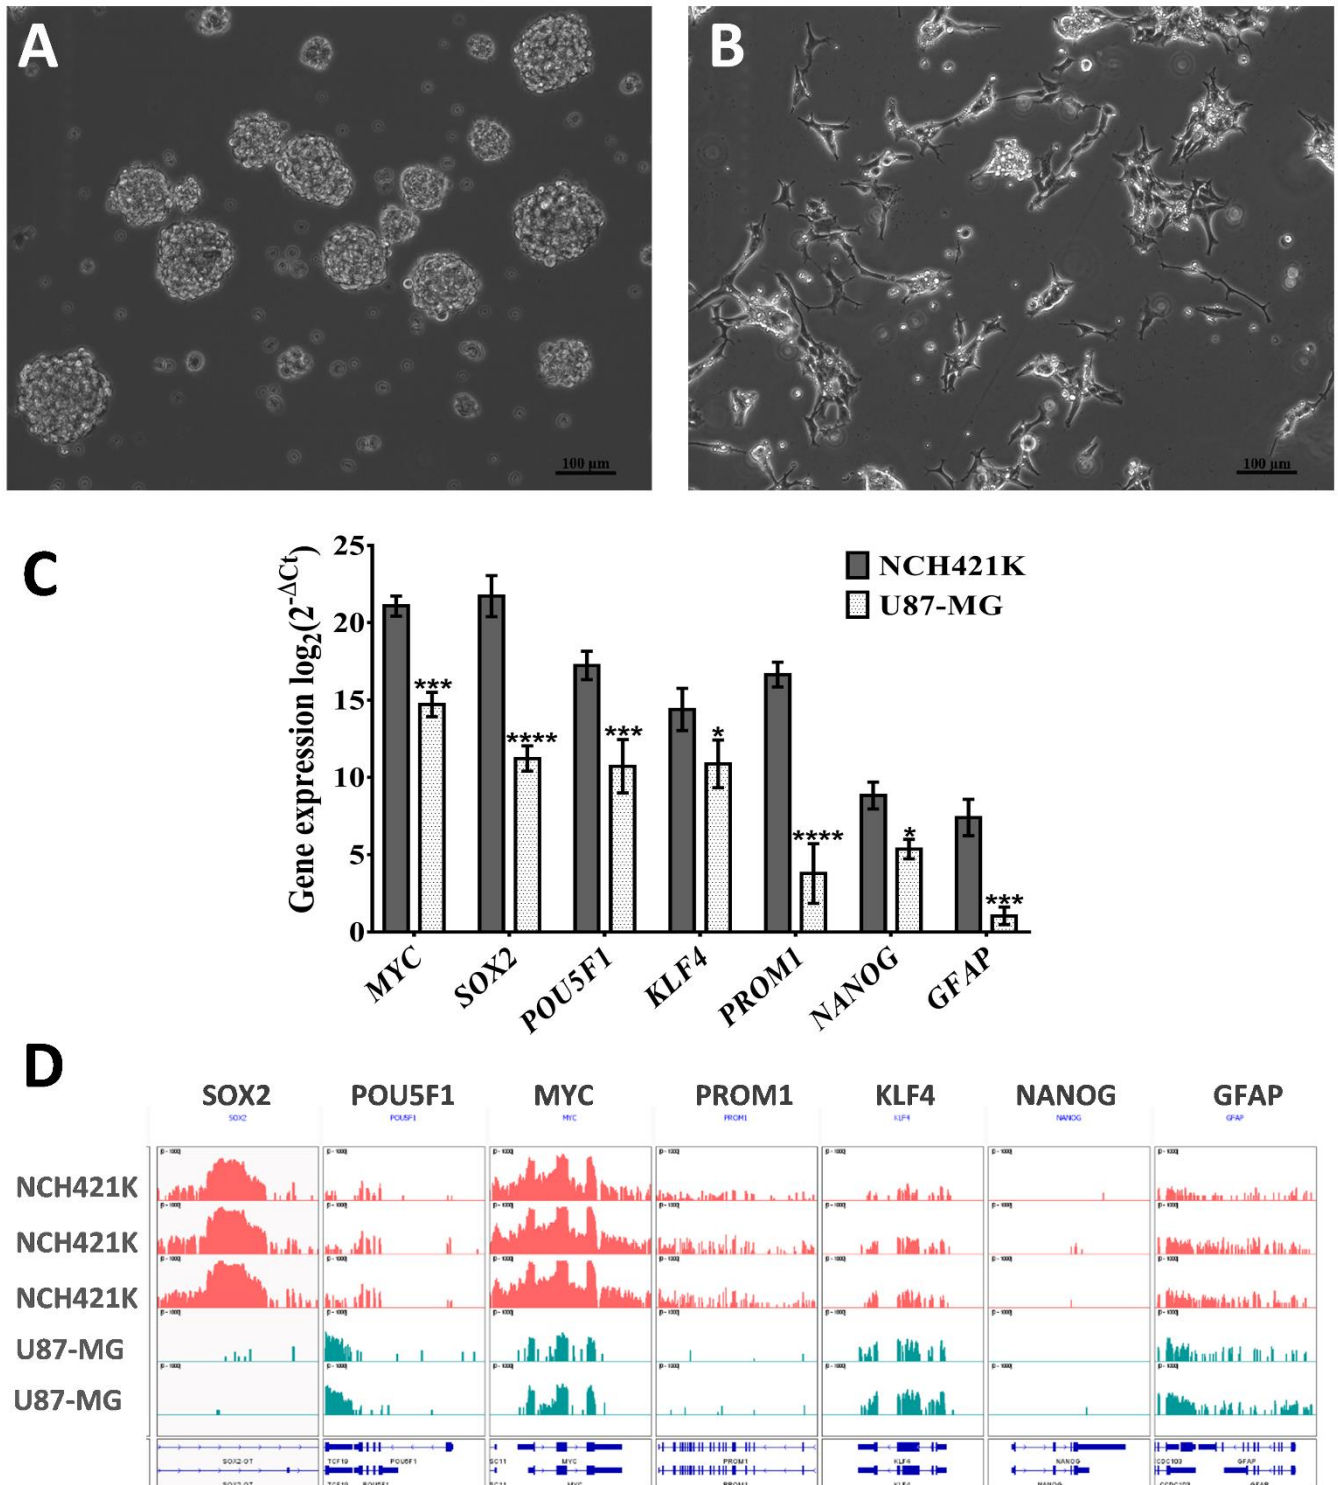

**Supplementary Figure S4.** Phase-contrast image of NCH421K cells growing in neurospheres before (A) and after (B) differentiation with serum. (C) Stemness gene expression in NCH421K cells as compared to U87-MG cells. Data are presented as means  $\pm$  SD. Statistical method: two-way ANOVA followed by Bonferroni's multiple comparisons test. \*  $P < 0.05$ , \*\*\*  $P < 0.001$ , and \*\*\*\*  $P < 0.0001$ . (D) Stemness markers expression data (input sample sequencing) in NCH42K (pink) and U87-MG (emerald) replicates.

### Procedures of Real-Time quantitative PCR

Extracted total RNA of NCH421K and U87 MG cells was treated with DNase I (Thermo Fisher Scientific, cat. no. EN0521) to eliminate the residues of DNA. The mRNA expression of SOX2, POU5F1, MYC, PROM1, KLF4, NANOG, GFAP and housekeeping gene ACTB was evaluated by using Quantitative real-time PCR (RT-qPCR) with SYBR-Green in a RT-PCR System “Applied Biosystems 7500 Fast” (Applied Biosystems, USA). The reaction was carried out in a total volume of 12  $\mu$ l, including 6  $\mu$ l of “Power SYBR Green PCR Master Mix” (Applied Biosystems, cat. no. 4367659), 15 ng of cDNA sample, 0.2  $\mu$ M of each primer, and nuclease-free water. Primer sequences are given in Table S2. Comparative  $2^{-\Delta\text{Ct}}$  method was used to evaluate analyzed gene expression in NCH421K and U87 MG cells.

**Table S2.** RT-qPCR primers

| Gene name     | Forward, 5' - 3'      | Reverse, 5' - 3'        | Amplicon size, bp |
|---------------|-----------------------|-------------------------|-------------------|
| <i>SOX2</i>   | TGCCTTCATGGTGTGGTC    | TTGCTGATCTCCGAGTTGTG    | 81                |
| <i>POU5F1</i> | AGTGAGAGGCAACCTGGA    | CTCGGACCACATCCTTCTC     | 104               |
| <i>MYC</i>    | CTACCCTCTCAACGACAGC   | CTTCTTGTTCCCTCCTCAGAGTC | 185               |
| <i>PROM1</i>  | TGGATGCAGAACTTGACAACG | ATACCTGCTACGACAGTCGTG   | 133               |
| <i>KLF4</i>   | CATTACCAAGAGCTCATGCCA | AATTTCCATCCACAGCCGT     | 221               |
| <i>NANOG</i>  | CAGCTACAAACAGGTGAAGAC | TGGTAGGAAGAGTAAAGGCT    | 144               |
| <i>GFAP</i>   | ACCTGCAGATTCGAGAAACC  | CTCCTTAATGACCTCTCCATCC  | 113               |
| <i>ACTB</i>   | AGAGCTACGAGCTGCCTGAC  | AGCACTGTGTTGGCGTACAG    | 184               |

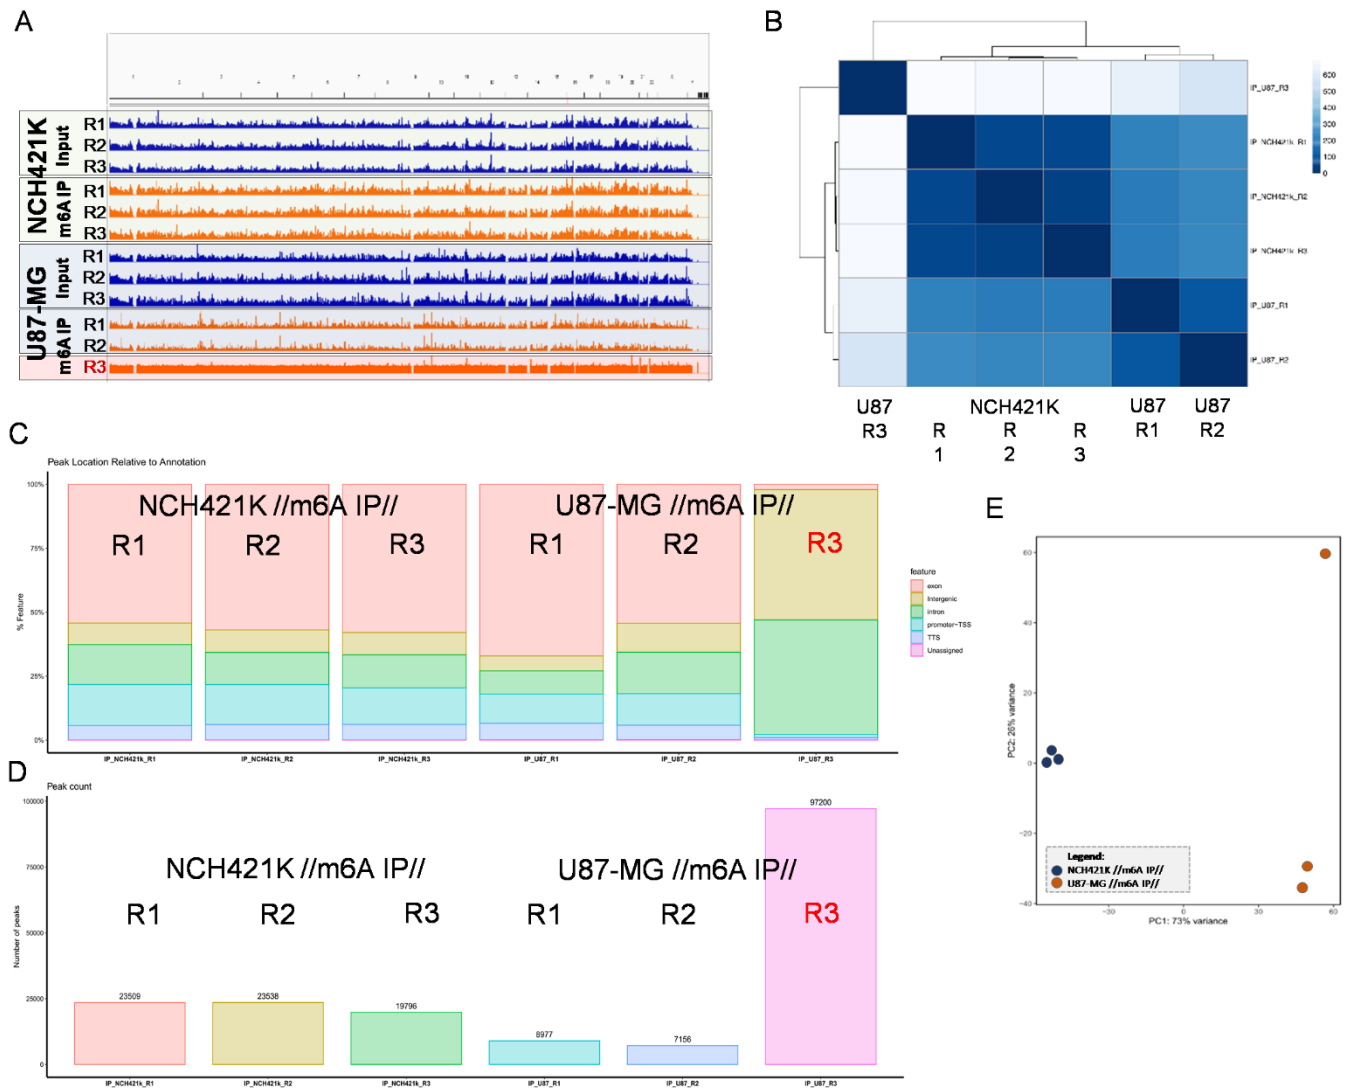

**Supplementary figure S5.** Overview of the called peaks (A) Intensity of called peaks. Minor rows represent replicate samples (blue – input, orange – m6A immunoprecipitated sample), major rows (light green and light blue) – NCH421K and U87-MG cell lines (respectively). The minor row, highlighted in red, shows unusually high signal intensity of 3<sup>rd</sup> U87-MG replicate. (B) Distance matrix indicating an extreme difference of U87-MG replicate 3 (upper left corner), compared to other samples. (C) Annotation proportions among MeRIP IP samples. (D) Total peak count in MeRIP IP samples. (E) PCA plot indicating the 3<sup>rd</sup> replicate of U87-MG as an outlier.
